# Supplementary material
Source: PubMed Central journal article supplement (PMC3951978)
Supplement: NIHMS554273-supplement-01.pdf [file NIHMS554273-supplement-01.pdf]

Supplemental Figure 1 (Cont.)

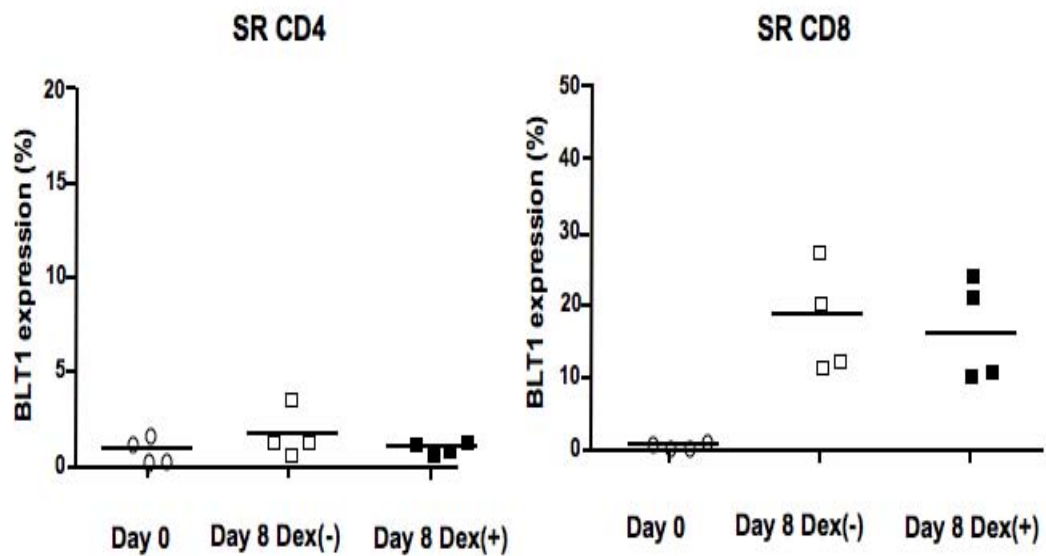

ACCEPTED

Supplemental Figure 1

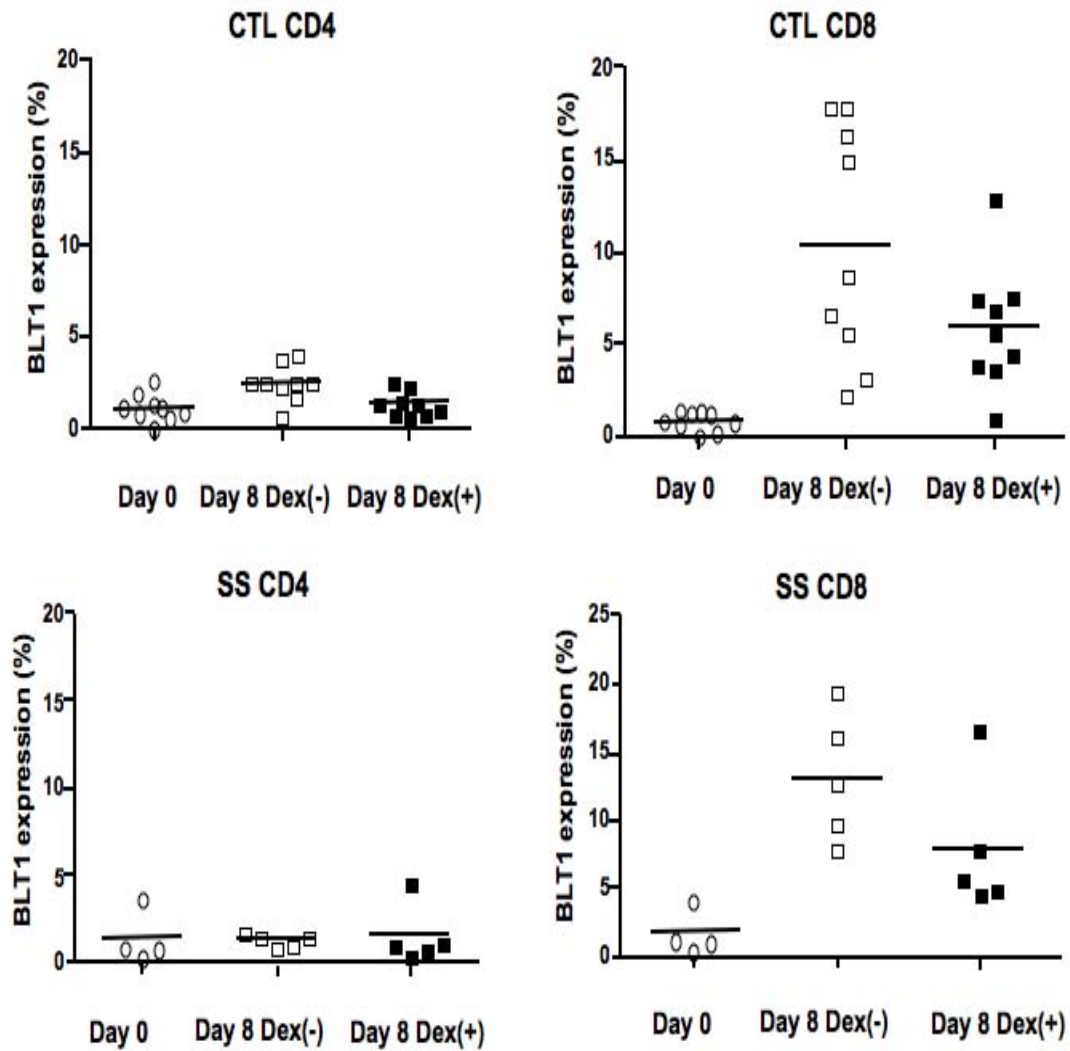

**Online Supplement Figure Legend**

Supplemental Figure 1. BLT1 expression on stimulated CD4+ and CD8+ T cells from individual samples. Isolated CD4+ and CD8+ T cells were stimulated with anti-CD3/anti-CD28 for 8 days and BLT1 expression was assessed by flow cytometry. BLT1 expression on unstimulated (day 0) and stimulated CD4+ and CD8+ T cells in the presence or absence of dexamethasone (Dex). -: no Dex, +: includes Dex.
